# Supplementary material for: Recombination in Glomus intraradices, a supposed ancient asexual arbuscular mycorrhizal fungus
Source: PubMed Central journal article supplement (PMC2630297; doi:10.1186/1471-2148-9-13), 2009-01-15
Supplement: 1471-2148-9-13-S1.pdf [file 1471-2148-9-13-S1.pdf]

**Additional file 1** – Polymorphism found in sequences of 11 loci among 17 genotypes of *Glomus intraradices* from one field and the isolate DAOM181602.

| <b>Loci</b> | <b>Aligned length (bp)</b> | <b>Substitutions</b> | <b>Indel</b> |
|-------------|----------------------------|----------------------|--------------|
| Bg32        | 273                        | 18                   | 6            |
| Bg42        | 274                        | 7                    | 5            |
| Bg62        | 315                        | 0                    | 4            |
| Bg196       | 315                        | 11                   | 8            |
| Bg235       | 331                        | 10                   | 6            |
| Bg273       | 253                        | 5                    | 7            |
| Bg276       | 314                        | 6                    | 6            |
| Bg303       | 136                        | 0                    | 2            |
| Bg348       | 214                        | 0                    | 7            |
| Bg355       | 332                        | 11                   | 3            |
| nr intron*  | 280                        | 7                    | 18           |
| Total       | 3037                       | 75                   | 72           |

\* the nuclear intron was identified by Croll et al. (2008) in an EST of currently unknown function.
