# Supplementary material for: Recombination in Glomus intraradices, a supposed ancient asexual arbuscular mycorrhizal fungus
Source: PubMed Central journal article supplement (PMC2630297; doi:10.1186/1471-2148-9-13), 2009-01-15
Supplement: 1471-2148-9-13-S2.pdf [file 1471-2148-9-13-S2.pdf]

**Additional file 5** - Alignment of 11 nuclear loci of 18 genotypes found in *G. intraradices*.

Alignment position 60

| Genotypes    | Loci (shaded in black/grey)                                   | Alignment position |
|--------------|---------------------------------------------------------------|--------------------|
|              | Bg32                                                          | 60                 |
| I            | CA ACCATTGGCTTCAGAAACAGCATTATAATCTCTAAGCCAAGCAACAGGATCTTGCTGA |                    |
| II           | CA ACCATTGGCTTCAGAAACAGCATTATAATCTCTAAGCCAAGCAACAGGATCTTGCTGA |                    |
| III          | CA ACCATTGGCTTCAGAAACAGCATTATAATCTCTAAGCCAAGCAACAGGATCTTGCTGA |                    |
| IV           | CA ACCATTGGCTTCAGAAACAGCATTATAATCTCTAAGCCAAGCAACAGGATCTTGCTGA |                    |
| V            | CA ACCATTGGCTTCAGAAACAGCATTATAATCTCTAAGCCAAGCAACAGGATCTTGCTGA |                    |
| VI           | CA ACCATTGGCTTCAGAAACAGCATTATAATCTCTAAGCCAAGCAACAGGATCTTGCTGA |                    |
| VII          | CA ACCATTGGCTTCAGAAACAGCATTATAATCTCTAAGCCAAGCAACAGGATCTTGCTGA |                    |
| VIII         | CA ACCATTGGCTTCAGAAACAGCATTATAATCTCTAAGCCAAGCAACAGGATCTTGCTGA |                    |
| IX           | CA ACCATTGGCTTCAGAAACAGCATTATAATCTCTAAGCCAAGCAACAGGATCTTGCTGA |                    |
| X            | CA ACCATTGGCTTCAGAAACAGCATTATAATCTCTAAGCCAAGCAACAGGATCTTGCTGA |                    |
| XI           | CA ACCATTGGCTTCAGAAACAGCATTATAATCTCTAAGCCAAGCAACAGGATCTTGCTGA |                    |
| XII          | CA ACCATTGGCTTCAGAAACAGCATTATAATCTCTAAGCCAAGCAACAGGATCTTGCTGA |                    |
| XIII         | CA ACCATTGGCTTCAGAAACAGCATTATAATCTCTAAGCCAAGCAACAGGATCTTGCTGA |                    |
| XIV          | CA ACCATTGGCTTCAGAAACAGCATTATAATCTCTAAGCCAAGCAACAGGATCTTGCTGA |                    |
| XV           | CA ACCATTGGCTTCAGAAACAGCATTATAATCTCTAAGCCAAGCAACAGGATCTTGCTGA |                    |
| XVI          | CA ACCATTGGCTTCAGAAACAGCATTATAATCTCTAAGCCAAGCAACAGGATCTTGCTGA |                    |
| XVII         | CA ACCATTGGCTTCAGAAACAGCATTATAATCTCTAAGCCAAGCAACAGGATCTTGCTGA |                    |
| XVIII        | CA ACCATTGGCTTCAGAAACAGCATTATAATCTCTAAGCCAAGCAACAGGATCTTGCTGA |                    |
| Conservation | *****                                                         |                    |

| Genotypes    | Loci (shaded in black/grey)                                  | Alignment position |
|--------------|--------------------------------------------------------------|--------------------|
|              | Bg32                                                         | 120                |
| I            | TTTTCTCCACTAAAAGTTGGTAAAAATGCTCCCCAACTTTGCTGATTCTGCTGGTTTTGT |                    |
| II           | TTTTCTCCACTAAAAGTTGGTAAAAATGCTCCCCAACTTTGCTGATTCTGCTGGTTTTGT |                    |
| III          | TTTTCTCCACTAAAAGTTGGTAAAAATGCTCCCCAACTTTGCTGATTCTGCTGGTTTTGT |                    |
| IV           | TTTTCTCCACTAAAAGTTGGTAAAAATGCTCCCCAACTTTGCTGATTCTGCTGGTTTTGT |                    |
| V            | TTTTCTCCACTAAAAGTTGGTAAAAATGCTCCCCAACTTTGCTGATTCTGCTGGTTTTGT |                    |
| VI           | TTTTCTCCACTAAAAGTTGGTAAAAATGCTCCCCAACTTTGCTGATTCTGCTGGTTTTGT |                    |
| VII          | TTTTCTCCACTAAAAGTTGGTAAAAATGCTCCCCAACTTTGCTGATTCTGCTGGTTTTGT |                    |
| VIII         | TTTTCTCCACTAAAAGTTGGTAAAAATGCTCCCCAACTTTGCTGATTCTGCTGGTTTTGT |                    |
| IX           | TTTTCTCCACTAAAAGTTGGTAAAAATGCTCCCCAACTTTGCTGATTCTGCTGGTTTTGT |                    |
| X            | TTTTCTCCACTAAAAGTTGGTAAAAATGCTCCCCAACTTTGCTGATTCTGCTGGTTTTGT |                    |
| XI           | TTTTCTCCACTAAAAGTTGGTAAAAATGCTCCCCAACTTTGCTGATTCTGCTGGTTTTGT |                    |
| XII          | TTTTCTCCACTAAAAGTTGGTAAAAATGCTCCCCAACTTTGCTGATTCTGCTGGTTTTGT |                    |
| XIII         | TTTTCTCCACTAAAAGTTGGTAAAAATGCTCCCCAACTTTGCTGATTCTGCTGGTTTTGT |                    |
| XIV          | TTTTCTCCACTAAAAGTTGGTAAAAATGCTCCCCAACTTTGCTGATTCTGCTGGTTTTGT |                    |
| XV           | TTTTCTCCACTAAAAGTTGGTAAAAATGCTCCCCAACTTTGCTGATTCTGCTGGTTTTGT |                    |
| XVI          | TTTTCTCCACTAAAAGTTGGTAAAAATGCTCCCCAACTTTGCTGATTCTGCTGGTTTTGT |                    |
| XVII         | TTTTCTCCACTAAAAGTTGGTAAAAATGCTCCCCAACTTTGCTGATTCTGCTGGTTTTGT |                    |
| XVIII        | TTTTCTCCACTAAAAGTTGGTAAAAATGCTCCCCAACTTTGCTGATTCTGCTGGTTTTGT |                    |
| Conservation | *****                                                        |                    |

| Genotypes    | Loci (shaded in black/grey)                                    | Alignment position |
|--------------|----------------------------------------------------------------|--------------------|
|              | Bg32                                                           | 180                |
| I            | TGATTTAAAA - TTGTTGG - - - - - ATGAACTGGGCCATCTGCAACATATTATTTT |                    |
| II           | TGATTTAAAAATTGTTGG - - - - - ATGAACTGGGCCATCTGCAACATATTATTTT   |                    |
| III          | TGATTTAAAA - TTGTTGG - - - - - ATGAACTGGGCCATCTGCAACATATTATTTT |                    |
| IV           | TGATTTAAAA - TTGTTGG - - - - - ATGAACTGGGCCATCTGCAACATATTATTTT |                    |
| V            | TGATTTAAAA - TTGTTGG - - - - - ATGAACTGGGCCATCTGCAACATATTATTTT |                    |
| VI           | TGATTTAAAA - TTGTTGG - - - - - ATGAACTGGGCCATCTGCAACATATTATTTT |                    |
| VII          | TGATTTAAAAATTGTTGG - - - - - ATGAACTGGGCCATCTGCAACATATTATTTT   |                    |
| VIII         | TGATTTAAAAATTGTTGG - - - - - ATGAACTGGGCCATCTGCAACATATTATTTT   |                    |
| IX           | TGATTTAAAA - TTGTTGG - - - - - ATGAACTGGGCCATCTGCAACATATTATTTT |                    |
| X            | TGATTTAAAA - TTGTTGG - - - - - ATGAACTGGGCCATCTGCAACATATTATTTT |                    |
| XI           | TGATTTAAAAATTGTTGGG - - - - - ATGAACTGGGCCATCTGCAACATATTATTTT  |                    |
| XII          | TGATTTAAAAATTGTTGG - - - - - ATGAACTGGGCCATCTGCAACATATTATTTT   |                    |
| XIII         | TGATTTAAAAATTGTTGG - - - - - ATGAACTGGGCCATCTGCAACATATTATTTT   |                    |
| XIV          | TGATTTAAAA - TTGTTGG - - - - - ATGAACTGGGCCATCTGCAACATATTATTTT |                    |
| XV           | TGATTTAAAAATTGTTGGG - - - - - AGGAACTGGGCGATCTGCAACATATTATTTT  |                    |
| XVI          | TGATTTAAAAATTGTTGGG - - - - - AGGAACTGGGCGATCTGCAACATATTATTTT  |                    |
| XVII         | TGATTTAAAAATTGTTGGATAAACTGGGAGTAAACTGGGCCATCTGCAACATATTATTTT   |                    |
| XVIII        | TGATTTAAAAATTGTTGG - - - - - ATGAACTGGGCCATCTGCAACATATTATTTT   |                    |
| Conservation | *****                                                          |                    |

| Genotypes    | Loci (shaded in black/grey)                                      | Alignment position |
|--------------|------------------------------------------------------------------|--------------------|
|              | Bq32                                                             | 240                |
| I            | TTTCCAAAAAGTTACCATTATTAACATTGTCATTCTGATTGTTGTTATTATCTCATGGAA     |                    |
| II           | TTTCCAAAAAGTTACCATTATTAACATTGTCATTCTGATTGTTGTTATTATCTCATGGAA     |                    |
| III          | TTTCCAAAAAGTTACCATTATTAACATTGTCATTCTGATTGTTGTTATTATCTCATGGAA     |                    |
| IV           | TTTCCAAAAAGTTACCATTATTAACATTGTCATTCTGATTGTTGTTATTATCTCATGGAA     |                    |
| V            | TTTCCAAAAAGTTACCATTATTAACATTGTCATTCTGATTGTTGTTATTATCTCATGGAA     |                    |
| VI           | TTTCCAAAAAGTTACCATTATTAACATTGTCATTCTGATTGTTGTTATTATCTCATGGAA     |                    |
| VII          | TTTCCAAAAAGTTACCATTATTAACATTGTCATTCTGATTGTTGTTATTATCTCATGGAA     |                    |
| VIII         | TTTCCAAAAAGTTACCATTATTAACATTGTCATTCTGATTGTTGTTATTATCTCATGGAA     |                    |
| IX           | TTTCCAAAAAGTTACCATTATTAACATTGTCATTCTGATTGTTGTTATTATCTCATGGAA     |                    |
| X            | TTTCCAAAAAGTTACCATTATTAACATTGTCATTCTGATTGTTGTTATTATCTCATGGAA     |                    |
| XI           | CTTCCAAAAAGTTACCATTATTAACATTGTTATTCTGATTGTTGCTATTATTTCTGAAA      |                    |
| XII          | TTTCCAAAAAGTTACCATTATTAACATTGTCATTCTGATTGTTGTTATTATCTCATGGAA     |                    |
| XIII         | TTTCCAAAAAGTTACCATTATTAACATTGTCATTCTGATTGTTGTTATTATCTCATGGAA     |                    |
| XIV          | TTTCCAAAAAGTTACCATTATTAACATTGTCATTCTGATTGTTGTTATTATCTCATGGAA     |                    |
| XV           | TTTCCAAAAAGTTACCAATTTT - - - - - CATTCTGATTGTTGTT - - - - - GGAA |                    |
| XVI          | TTTCCAAAAAGTTACCATTTTT - - - - - CATTCTGATTGTTGTT - - - - - GGAA |                    |
| XVII         | CTTCCAAAAAGTTACCATTATTAATATTATTCTGATTGTTGTTATTATCTCATGGAA        |                    |
| XVIII        | TTTCCAAAAAGTTACCATTATTAACATTGTCATTCTGATTGTTGTTATTATCTCATGGAA     |                    |
| Conservation | *****                                                            |                    |
