# Supplementary material for: Recombination in Glomus intraradices, a supposed ancient asexual arbuscular mycorrhizal fungus
Source: PubMed Central journal article supplement (PMC2630297; doi:10.1186/1471-2148-9-13), 2009-01-15

**Additional file 4 - Phylogenetic relationships among genotypes in a population of *G. intraradices***

Neighbour-network using uncorrected  $p$  distance showing reticulate phylogenetic branching among a core set of genotypes. Bootstrap support of branches above 90% is indicated in % of 1000 replicates. Analyses were performed with two different restrictions. A. All indels were removed and only substitutions were considered in the analysis. B. Strongly divergent genotypes (XI, XV-XVIII) were removed from the analysis.

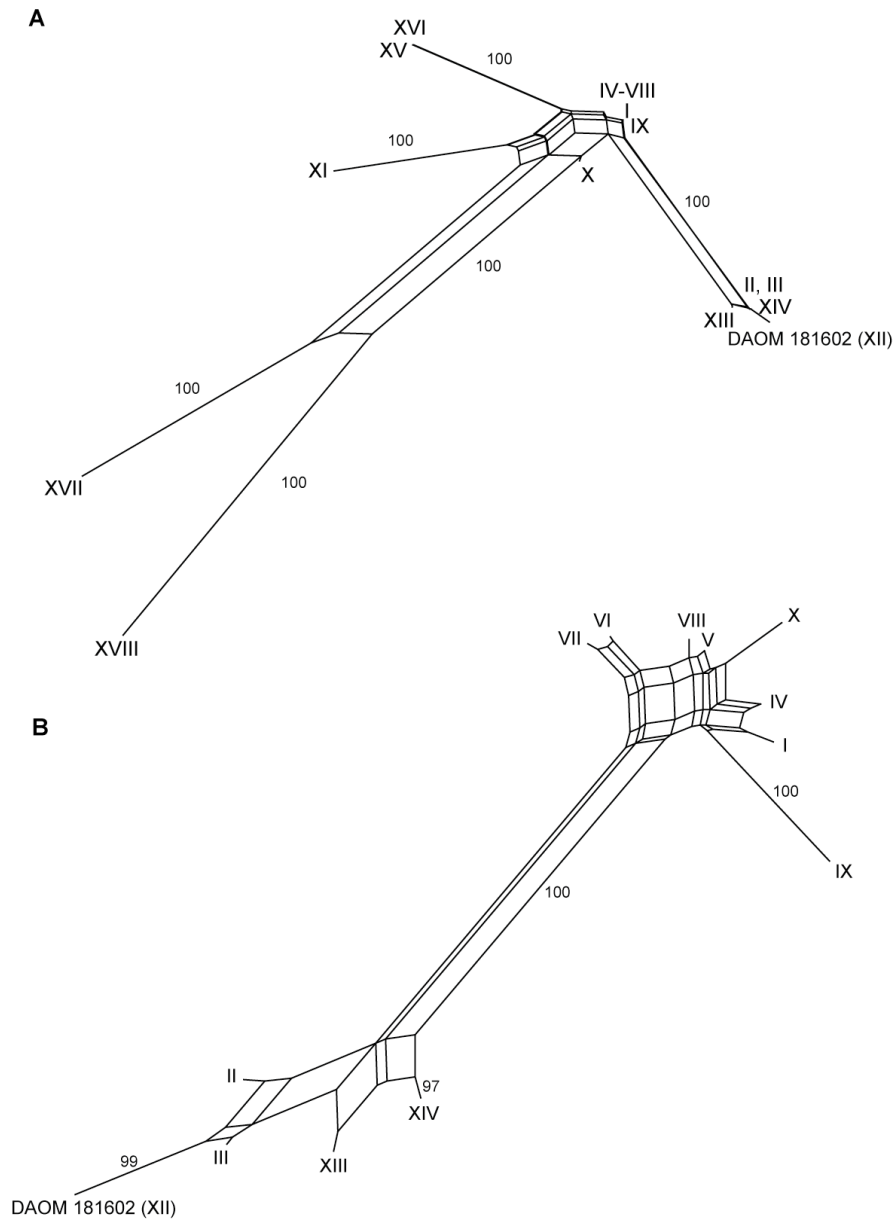

Supplement: 1471-2148-9-13-S4.pdf [file 1471-2148-9-13-S4.pdf]
