# Supplementary material for: Recombination in Glomus intraradices, a supposed ancient asexual arbuscular mycorrhizal fungus
Source: PubMed Central journal article supplement (PMC2630297; doi:10.1186/1471-2148-9-13), 2009-01-15

**Additional file 5 – Summary of five recombination tests based on the concatenated sequences of 11 nuclear loci. Loci are concatenated arbitrarily according to the locus labels.**

Colored shading indicates putative recombinant regions in the different sequences of the different genotypes. Different colors show results of the different tests. For individual tests, recombinant regions can overlap as all significant recombinant regions were kept in the analysis. Significance was based on  $p < 0.05$ , corrected for multiple comparisons.

**Genotypes**

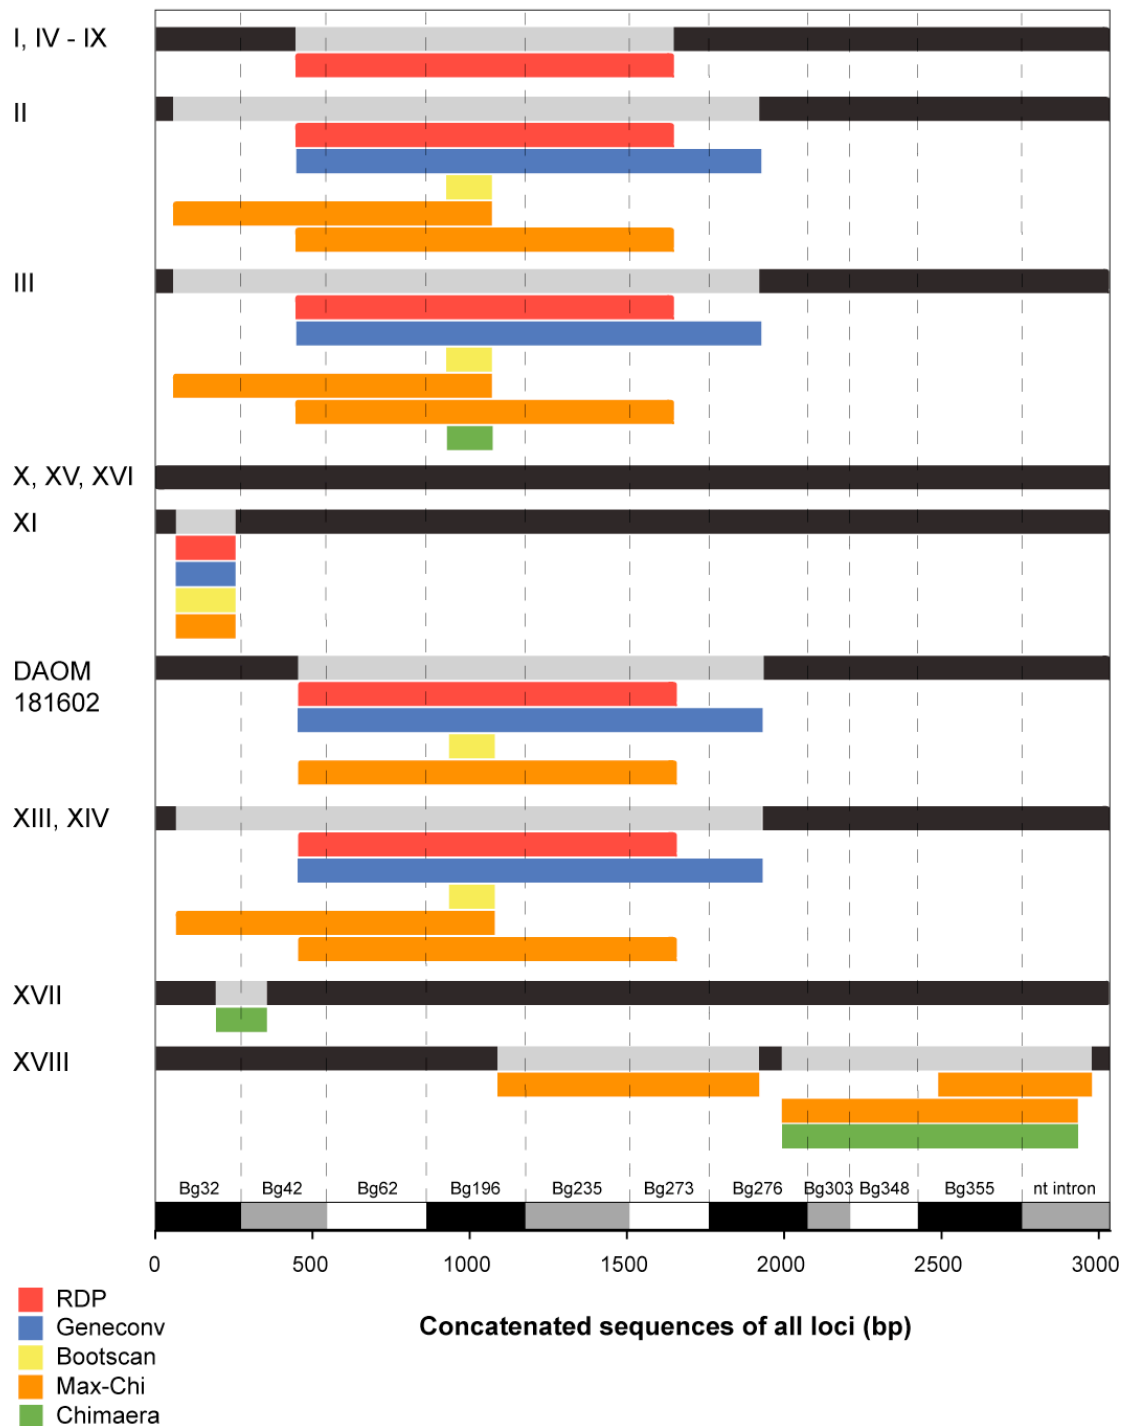

Supplement: 1471-2148-9-13-S5.pdf [file 1471-2148-9-13-S5.pdf]
