# Supplementary material for: Recombination in Glomus intraradices, a supposed ancient asexual arbuscular mycorrhizal fungus
Source: PubMed Central journal article supplement (PMC2630297; doi:10.1186/1471-2148-9-13), 2009-01-15

**Additional file 7 – Summary of five recombination tests based on the concatenated sequences of 11 nuclear loci. Loci are concatenated in a 2<sup>nd</sup> arbitrary order compared to additional file 5.**

Colored shading indicates putative recombinant regions in the different sequences of the different genotypes. Different colors show results of the different tests. For individual tests, recombinant regions can overlap as all significant recombinant regions were kept in the analysis. Significance was based on  $p < 0.05$ , corrected for multiple comparisons.

**Genotypes (loci in 2<sup>nd</sup> arbitrary order)**

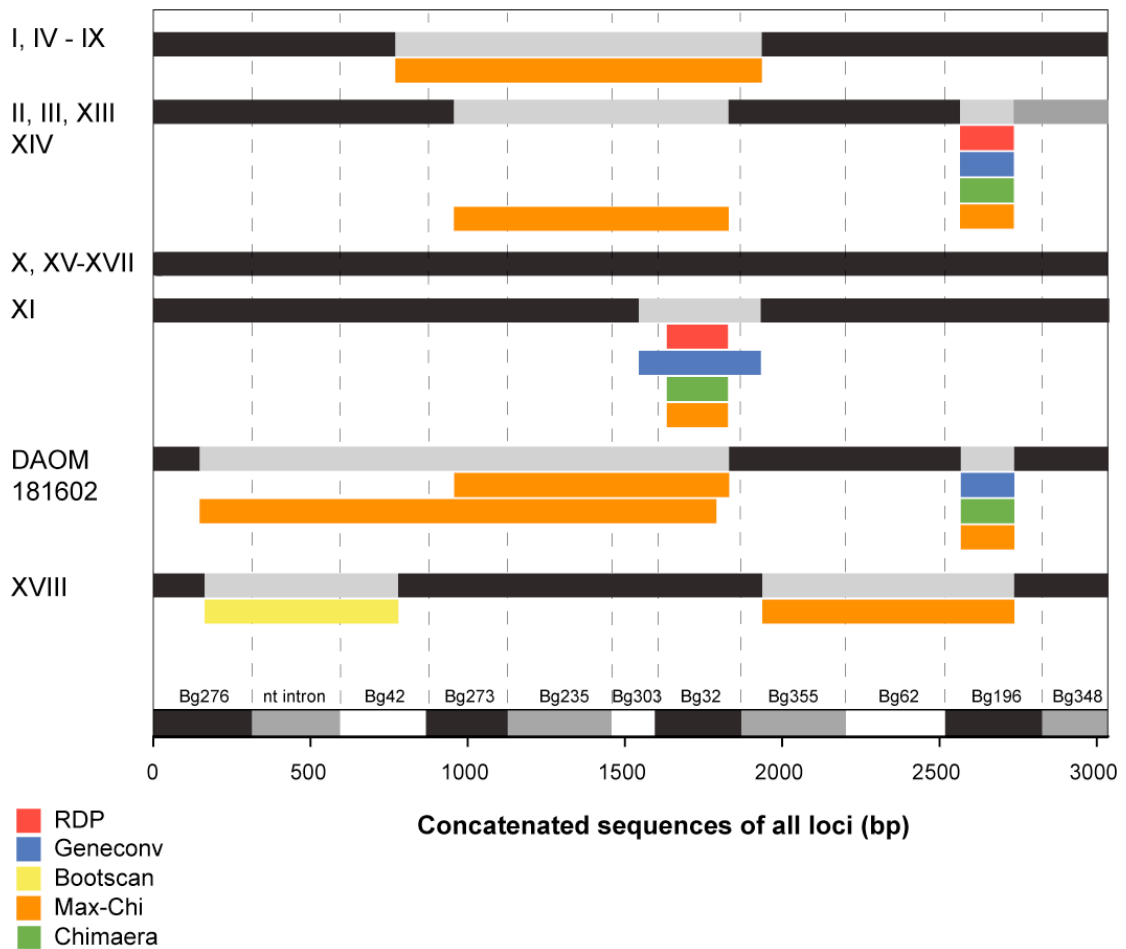

Supplement: 1471-2148-9-13-S7.pdf [file 1471-2148-9-13-S7.pdf]
