# Supplementary material for: Recombination in Glomus intraradices, a supposed ancient asexual arbuscular mycorrhizal fungus
Source: PubMed Central journal article supplement (PMC2630297; doi:10.1186/1471-2148-9-13), 2009-01-15
Supplement: 1471-2148-9-13-S8.pdf [file 1471-2148-9-13-S8.pdf]

**Additional file 8** – Details of the recombination breakpoint analysis with the Recombination Detection Program on concatenated sequences of the 11 loci among 17 genotypes of one field of *Glomus intraradices* and the isolate DAOM181602. The concatenation order corresponds to the arbitrary order presented in additional file 5.

| Genotype   | Breakpoints (bp) | Loci         | Method | Probability |
|------------|------------------|--------------|--------|-------------|
| I, IV-IX   | 451-1657         | Bg42-273     | RDP    | 3.757E-02   |
| II         | 451-1657         | Bg42-273     | RDP    | 1.536E-03   |
| II         | 449-1921         | Bg42-276     | GC     | 1.939E-02   |
| II         | 929-1067         | Bg196        | BOOT   | 1.999E-02   |
| II         | 56-1067          | Bg32-Bg196   | MAX    | 4.163E-03   |
| II         | 451-1657         | Bg42-273     | MAX    | 2.961E-05   |
| III        | 451-1657         | Bg42-273     | RDP    | 1.536E-03   |
| III        | 449-1921         | Bg42-276     | GC     | 1.939E-02   |
| III        | 929-1067         | Bg196        | BOOT   | 2.268E-02   |
| III        | 56-1067          | Bg32-Bg196   | MAX    | 4.079E-03   |
| III        | 451-1657         | Bg42-273     | MAX    | 2.961E-05   |
| III        | 929-1067         | Bg196        | CHIM   | 1.517E-02   |
| XI         | 56-239           | Bg32         | RDP    | 1.300E-03   |
| XI         | 56-239           | Bg32         | GC     | 1.134E-02   |
| XI         | 56-239           | Bg32         | BOOT   | 1.084E-03   |
| XI         | 56-239           | Bg32         | MAX    | 4.651E-03   |
| DAOM181602 | 451-1657         | Bg42-273     | RDP    | 2.798E-03   |
| DAOM181602 | 449-1921         | Bg42-276     | GC     | 3.610E-02   |
| DAOM181602 | 929-1067         | Bg196        | BOOT   | 4.559E-02   |
| DAOM181602 | 451-1657         | Bg42-273     | MAX    | 2.095E-04   |
| XIII, XIV  | 451-1657         | Bg42-273     | RDP    | 1.536E-03   |
| XIII, XIV  | 449-1921         | Bg42-276     | GC     | 1.939E-02   |
| XIII, XIV  | 451-1657         | Bg42-273     | MAX    | 2.961E-05   |
| XIII       | 929-1067         | Bg196        | BOOT   | 1.013E-02   |
| XIII       | 56-1067          | Bg32-Bg196   | MAX    | 1.058E-04   |
| XIV        | 929-1067         | Bg196        | BOOT   | 8.906E-03   |
| XIV        | 56-1067          | Bg32-Bg196   | MAX    | 1.080E-04   |
| XVII       | 182-336          | Bg32-Bg42    | CHIM   | 1.516E-03   |
| XVIII      | 2002-2948        | Bg276-nr int | GC     | 4.803E-02   |
| XVIII      | 1091-1922        | Bg196-276    | MAX    | 7.509E-04   |
| XVIII      | 2503-2995        | Bg355-nr int | MAX    | 2.939E-02   |
| XVIII      | 2002-2948        | Bg276-nr int | MAX    | 8.414E-04   |
| XVIII      | 2002-2948        | Bg276-nr int | CHIM   | 8.461E-06   |

Breakpoints were located in the sequence alignment of all loci concatenated in the following order: Bg32, Bg42, Bg62, Bg196, Bg235, Bg273, Bg276, Bg303, Bg348, Bg355 and nuclear intron. The total alignment length was 3037bp. Recombination tests included Bootscan (BOOT), Chimaera (CHIM), Geneconv (GC), MaxChi (MAX) and Recombination Detection Program (RDP). Probabilities are multiple comparisons corrected and represent the global K-A probability (Geneconv), binomial probability (RDP), regional probability (MaxChi and Chimaera), respectively.
